# Supplementary material
Source: publisher figshare collection journal article supplement (https://gsapubs.figshare.com/ndownloader/files/40803371)
Supplement: Supplementary file 1 [file 40803371]

## Sheet: Whole-rock
Sample	Group	Reference	SiO2	TiO2	Al2O3	FeOt	MgO	MnO	CaO	Na2O	K2O	P2O5	Loi	Total	Li	Be	Sc	V	Cr	Co	Ni	Cu	Zn	Ga	Rb	Sr	Y	Zr	Nb	Cs	Ba	La	Ce	Pr	Nd	Sm	Eu	Gd	Tb	Dy	Ho	Er	Tm	Yb	Lu	Hf	Ta	W	Pb
CQ-11A	MME2	This paper	52.93	1.03	15.81	8.28829	5.9	0.2	6.73	3.83	2.61	0.69	1.12	99.1383	164.05	8.77	61.24	125.07	290.91	22.7	111.72	12.34	128.15	26.74	174.535	360.548	56.9	361.2	17.7	13.14	563.72	21.66	70.48	12.23	63.12	19	2.09	15.208	2.645	12.704	2.061	5.145	0.71	4.2	0.58	8.19	1.65		19.9
2Q-92	MME2	This paper	56.36	1.11	15.38	7.09009	4.74	0.15	5.19	3.6	3.46	0.7	0.85	98.6301	171.47	7.85	31.89	99.33	264.13	21.46	135.66	28.75	120.31	26.5	183.59	326.54	52.42	364	19.26	19.63	960.62	120.21	259.85	29.68	114.26	22.97	2.24	17.186	2.516	11.835	1.908	4.736	0.65	3.83	0.53	7.42	2.34		27.07
3Q-92	MME2	This paper	56.9	1.07	15.3	6.63063	4.55	0.16	4.95	3.18	5.06	0.62	0.9	99.3206	111	9		94	200	17	81				224	359	62	323	23		1450	69.3	170	23.5	106	26.6	3.65	22.4	3.1	16.4	2.67	7.8	0	5.8	0.78	8.4		3	21
15Q-92	MME2	This paper	57	1.17	16.6	6.15315	4.27	0.14	5.32	4.3	3.09	0.5	0.8	99.3432	131	6		92	200	14	63				195	389	31	323	19		863	58.9	125	15	60.4	12.3	3	11.2	1.3	7.1	1.11	3.2	0.4	2.6	0.34	7.1		2	5
4Q-92	MME2	This paper	58.7	0.994	15.5	5.64865	4.17	0.14	5.08	3.53	4	0.38	0.95	99.0926	83	7		100	330	15	49				168.869	348.646	35	304	20		1090	44.6	123	16.3	67.4	14.6	3.88	12.9	1.6	8.5	1.39	4.2	0.6	3.7	0.51	7.6		3	16
5Q-92	MME2	Gómez-Frutos and Castro 2022	60	0.87	15.5	5.99099	4.27	0.13	5.31	3.95	2.16	0.52	0.7	99.401	137	9		99	270	16	68				149	392	46	332	14		320	30.8	73.7	10.1	46.5	12.8	1.7	10.7	1.6	8.5	1.41	3.8	0.5	2.9	0.39	8.7		3	6
7Q-92	MME2	This paper	61.32	0.95	16.18	4.78378	3.36	0.1	4.34	3.89	3.74	0.35	0.52	99.5338	118.48	5.52	13.19	74.47	128.23	14.17	65.52	9.34	82.34	22.22	183.685	363.845	39.61	244.7	16.88	9.33	687.98	34.73	100.62	14.05	58.89	12.88	2.23	9.497	1.525	8.051	1.44	3.953	0.59	3.55	0.44	4.44	2.72		29.31
CQ-7-92 (CQ7c)	MME1	Castro et al. 2023	63.5	0.851	15.8	4.41441	2.6	0.09	3.66	4.11	2.8	0.32	0.65	98.7954	122	7		79	250	10	28				190.477	344.236	22	326	15		716	56.3	104	11.2	42.5	8.2	1.62	7.9	0.8	4.5	0.69	2	0.2	1.5	0.24	8.4		2	19
11Q-92	MME1	Castro et al. 2023	63.83	0.85	15.79	4.21622	2.46	0.12	4.14	3.98	2.51	0.36	1.29	99.5462	143.44	5.03	7.47	64.45	58.05	11.26	30.29	5.15	73.97	20.16	185.011	321.012	18.14	272.2	12.31	10.05	627	38.56	89.19	9.39	34.32	6.46	1.04	4.962	0.685	3.61	0.651	1.766	0.26	1.57	0.23	6.13	0.99		22.27
17Q-92	MME1	This paper	64.83	0.75	15.75	3.8018	2.32	0.09	3.5	3.97	2.98	0.24	0.67	98.9018	131.31	4.93	7.46	59.74	63.78	10.3	31.07	2.93	62.83	21.44	91.95	281.11	14.97	240.1	10.9	9.55	631.65	32.49	70.72	7.29	26.36	4.96	1.14	3.594	0.462	2.568	0.501	1.302	0.19	1.16	0.17	4.61	0.77		24.37
A521-1	MME1	This paper	63.83	0.84	16.12	4.0673	2.39	0.07	3.84	3.98	2.61	0.31	0.81	98.8673	111.304	5.88355	10.8825	70.1941	154.411	9.93431	23.6355	5.50433	69.1958	27.934	161.504	366.672	15.4921	246.5	12.2665	8.54288	604.253	71.0937	129.958	14.4501	49.6701	7.2795	1.2976	7.94997	0.739697	3.45078	0.609115	1.74126	0.227466	1.42472	0.2198	3.37241	0.722046	1.46053	21.1142
A521-2	MME2	This paper	59.64	1.01	16.21	5.5447	3.59	0.11	4.31	3.96	3.21	0.36	0.9	98.8447	138.046	6.03277	14.5201	92.6811	241	14.5665	56.97	4.31646	93.465	26.3136	177.106	366.963	33.784	208.7	18.1799	16.3253	685.09	27.7656	71.0052	9.9244	43.0338	10.0425	1.5066	9.81859	1.27412	6.92238	1.26382	3.7035	0.506857	3.19729	0.460801	3.0677	1.87199	1.24133	23.1599
A521-3	MME2	This paper	60.71	0.78	16.03	4.7793	3.64	0.1	4.76	3.82	3.39	0.29	0.54	98.8393	97.1732	4.69247	16.8315	86.8591	165.827	14.3147	52.0381	5.32411	78.9817	24.5101	156.17	370.923	28.3526	203.4	12.0571	10.1103	850.643	33.7975	73.4343	10.4023	43.4919	9.33335	1.55717	9.07722	1.1253	5.96962	1.08102	3.14104	0.415174	2.60575	0.382468	3.66183	1.56189	0.967548	28.1553
A521-4	MME2	This paper	57.82	1.26	16.94	5.6604	3.67	0.11	4.44	3.98	3.83	0.43	0.62	98.7604	117.498	5.79157	14.7622	97.4228	129.137	15.5351	34.3558	8.2133	86.1824	28.8908	190.032	362.651	37.4219	273.7	21.0264	8.03282	963.466	39.3912	99.8832	14.8831	60.5778	12.1835	2.51521	11.3958	1.40853	7.5667	1.38544	4.05578	0.554397	3.46286	0.494381	3.44185	2.18985	0.937575	26.1398
A521-6	MME2	Castro et al. 2023	58.21	1.16	14.82	6.9064	5.01	0.14	4.54	3.4	2.97	0.56	0.75	98.4664	148.96	6.46626	18.7314	106.117	226.797	17.3752	66.8301	16.6767	124.2	26.7081	186.869	322.673	34.9458		16.0579	17.1865	566.754	31.9592	76.4513	11.4046	50.1619	11.5117	1.36623	10.9368	1.38478	7.34319	1.32843	3.84289	0.538052	3.34179	0.509208	4.45582	1.47005	13.3222	20.13
A521-12	MME2	This paper	57.04	0.96	17.19	5.8206	4.13	0.12	4.74	4.14	3.47	0.52	0.78	98.9106	177.669	7.10782	33.4858	103.619	176.601	16.7612	63.7548	5.51672	101.466	34.2972	223.714	350.011	45.9132	297.4	17.0569	17.8023	509.626	63.1165	132.77	17.2384	68.7974	14.7834	1.47968	15.0042	1.87854	9.58886	1.76759	4.99067	0.698949	4.06969	0.627551	4.68376	1.66863	1.13751	28.7012
A521-13	MME2	This paper	61.29	0.97	16.07	5.2777	3.5	0.1	4.33	3.69	2.48	0.45	0.72	98.8777	160.706	5.54863	15.4615	92.6185	164.275	15.7157	55.2773	8.39659	95.8534	29.1654	200.762	380.528	23.2102	256.5	14.8766	11.7801	399.633	58.3914	115.361	13.7051	50.5188	8.99578	1.27826	9.23043	1.00619	4.96366	0.876497	2.51029	0.318103	1.90526	0.276537	3.39677	0.877606	1.27263	20.0878
A521-14	MME2	Castro et al. 2023	56.49	1.03	15.91	6.4614	4.65	0.13	3.91	3	5.57	0.61	0.72	98.4814	154.669	4.38556	20.3647	121.616	271.412	19.8547	70.604	42.8125	112.413	33.4107	310.796	278.449	39.1361	256.7	17.098	14.1268	1025.19	80.5328	164.42	20.9394	82.2376	15.2784	1.61847	14.6178	1.6193	8.09752	1.41249	4.08126	0.532299	3.1945	0.461765	4.02898	1.14111	1.18352	34.6858
A521-11	MME1	This paper	64.31	0.89	16.19	4.1652	1.94	0.06	3.47	3.76	3.26	0.4	0.64	99.0852	141.094	4.08442	10.1282	70.2397	133.86	8.93745	15.7896	6.94125	66.6336	27.4844	167.352	409.258	18.1921	314.7	17.4219	7.23433	845.568	63.9618	122.247	14.0971	50.0365	7.74889	1.5464	8.08866	0.795853	3.80125	0.682598	1.96468	0.264828	1.68942	0.255433	3.43113	1.27728	1.12961	24.0265
A622-1	MME1	This paper	64.3	0.91	16.11	4.1563	1.98	0.06	3.42	3.77	3.56	0.41	0.48	99.1563	164.29	4.55	8.01	71.96	136.21	9.28	17.71	9.34	62.96	20.58	154.52	402.53	19.98	318.9	16.02	7.54	879.7	61.86	124.24	12.65	47.47	7.73	1.35	5.87	0.76	3.55	0.71	1.77	0.28	1.67	0.25	4.22	1.22		25.92
C321-3	Granodiorite	Castro et al. 2023	69.53	0.43	14.94	2.2873	1.13	0.14	4.54	3.4	2.97	0.56	0.75	100.677	93.4275	4.63443	5.71506	38.7546	153.997	5.06985	12.7547	0.723256	44.3632	20.6642	187.482	254.41	10.6552	140.4	8.30213	12.5146	568.604	27.3342	50.5339	6.04708	21.8849	4.14985	0.906138	4.23649	0.469601	2.29776	0.409164	1.17668	0.168805	1.09036	0.169741	2.97911	0.870997	1.25814	35.437
C321-6	Granodiorite	Castro et al. 2023	69.4	0.41	14.97	2.314	1.12	0.08	3.3	3.57	2.68	0.38	1.55	99.774	117.582	5.36036	6.18831	43.6688	195.706	5.11274	12.7711	1.43131	48.5659	21.5536	219.286	271.179	11.7657	140.1	8.88822	9.63791	571.64	29.9325	54.775	6.47885	23.5855	4.44394	0.971721	4.57078	0.503885	2.44581	0.437803	1.30323	0.176945	1.13386	0.175959	3.08192	1.01425	1.32224	35.5765
C321-7	Granodiorite	Castro et al. 2023	69.57	0.43	15.07	2.3674	1.09	0.08	3.46	3.63	2.79	0.33	0.95	99.7674	119.117	5.08234	6.39245	48.0626	242.392	5.27868	16.8966	2.93559	44.2858	21.8538	220.193	287.1	11.7036	131.8	8.63484	9.79424	593.03	31.9957	57.785	6.87168	24.764	4.57356	0.997356	4.67222	0.508091	2.44584	0.427803	1.24013	0.172669	1.09565	0.172305	2.99612	0.884323	1.40717	36.3158
C321-8	Granodiorite	Castro et al. 2023	67.73	0.58	15.44	2.9637	1.64	0.09	3.14	3.66	3.3	0.38	0.89	99.8137	86.6957	5.12545	8.09746	61.8809	187.435	7.9767	19.303	3.11994	57.9685	22.2506	206.94	397.953	12.4143	163.3	10.6618	10.5976	712.401	28.1053	53.0731	6.33797	24.0031	4.53839	1.23359	4.61499	0.501331	2.49738	0.458862	1.31953	0.182394	1.18082	0.189749	2.64759	0.968792	1.2525	28.7281
C321-9	Granodiorite	Castro et al. 2023	68.24	0.54	15.55	2.67	1.39	0.07	3.34	3.68	2.46	0.25	0.49	98.68	111.319	5.66745	7.77923	54.2486	197.792	6.58768	15.6554	2.46713	82.506	22.6673	212.51	375.384	13.9955	149	9.62626	10.3326	690.83	34.0713	62.3528	7.36542	26.5959	4.86411	1.20545	5.07193	0.607666	2.81099	0.548151	1.51681	0.248172	1.38006	0.238478	2.83602	1.17941	1.31362	30.3659
C321-11	Granodiorite	Castro et al. 2023	67.02	0.57	15.82	2.9637	1.66	0.06	3.47	3.76	3.26	0.4	0.64	99.6237	105.831	4.66518	8.42999	57.643	182.051	7.86974	20.9261	1.41255	67.5687	22.4352	110.282	339.874	12.6647	165.2	9.18163	6.83464	711.525	28.399	52.0601	6.42129	21.4064	4.3925	1.31794	4.70726	0.532144	2.6265	0.47787	1.35253	0.182545	1.07534	0.168674	3.27855	0.897412	1.14452	28.0254
A622-2	Granodiorite	Castro et al. 2023	67.14	0.57	15.63	3.0349	1.75	0.05	3	3.48	3.58	0.22	0.65	99.1049	126.77	5.33	5.14	61.95	248.4	8.57	48.78	7.95	49.86	19.3	61	272.65	12.63	159.1	8.7	6.75	402.4	32.13	66.91	7.02	25.88	4.67	1.13	3.61	0.48	2.34	0.45	1.17	0.18	1.12	0.17	3.74	0.81		26.53
		Gómez-Frutos, D., & Castro, A. (2022). Sanukitoid crystallization relations at 1.0 and 0.3 GPa. Lithos, 414, 106632.
		Castro, A., Rodríguez, C., Gutiérrez-Alonso, G. & de la Rosa, J.D. (2023). A post-collisional batholith from Southern Iberia rooted in the Earth’s mantle: Los Pedroches batholith, Spain. Lithos
[truncated: 2 more columns]

## Sheet: Isotopes
Sample	Reference	Group	Age	87Rb/86Sr	87Sr/86Sr	±2SD	147Sm/144Nd	143Nd/144Nd	±2SD
CQ-11A	This paper	MME2	300	1.40112	0.711727	0.001	0.182689	0.512506	0.002
4Q-92	This paper	MME2	300	1.40189	0.711584	0.002	0.117917	0.512399	0.001
7Q-92	This paper	MME2	300	1.46124	0.711944	0.002	0.132588	0.512415	0.002
CQ7-92	Castro et al. 2023	MME1	300	1.60168	0.71256	0.002	0.107509	0.51238	0.002
11Q-92	Castro et al. 2023	MME1	300	1.66841	0.71341	0.002	0.11043	0.512363	0.001
C321-8	Castro et al. 2023	Granodiorite	300	1.12627	0.710297	0.002	0.115753	0.512358	0.002
C321-11	Castro et al. 2023	Granodiorite	300	0.93905	0.710493	0.002	0.124061	0.512368	0.003
C321-14	Castro et al. 2023	Opx-bearing dacites	300	0.990466	0.711183	0.003	0.120163	0.512357	0.003
A521-5	This paper	Opx	300	1.20951	0.713684	0.002	0.143213	0.512429	0.001
